# Supplementary material
Source: publisher site journal article supplement (https://www.spandidos-publications.com/6291/downloadSupplementary)

Figure S1. Single-cell sequencing data analysis. (A) UMAP dimension reduction diagram showing the distribution of key TBI genes among cells. (B) Violin diagram displaying the distribution of key TBI genes among cells. UMAP, Uniform Manifold Approximation and Projection; TBI, traumatic brain injury.

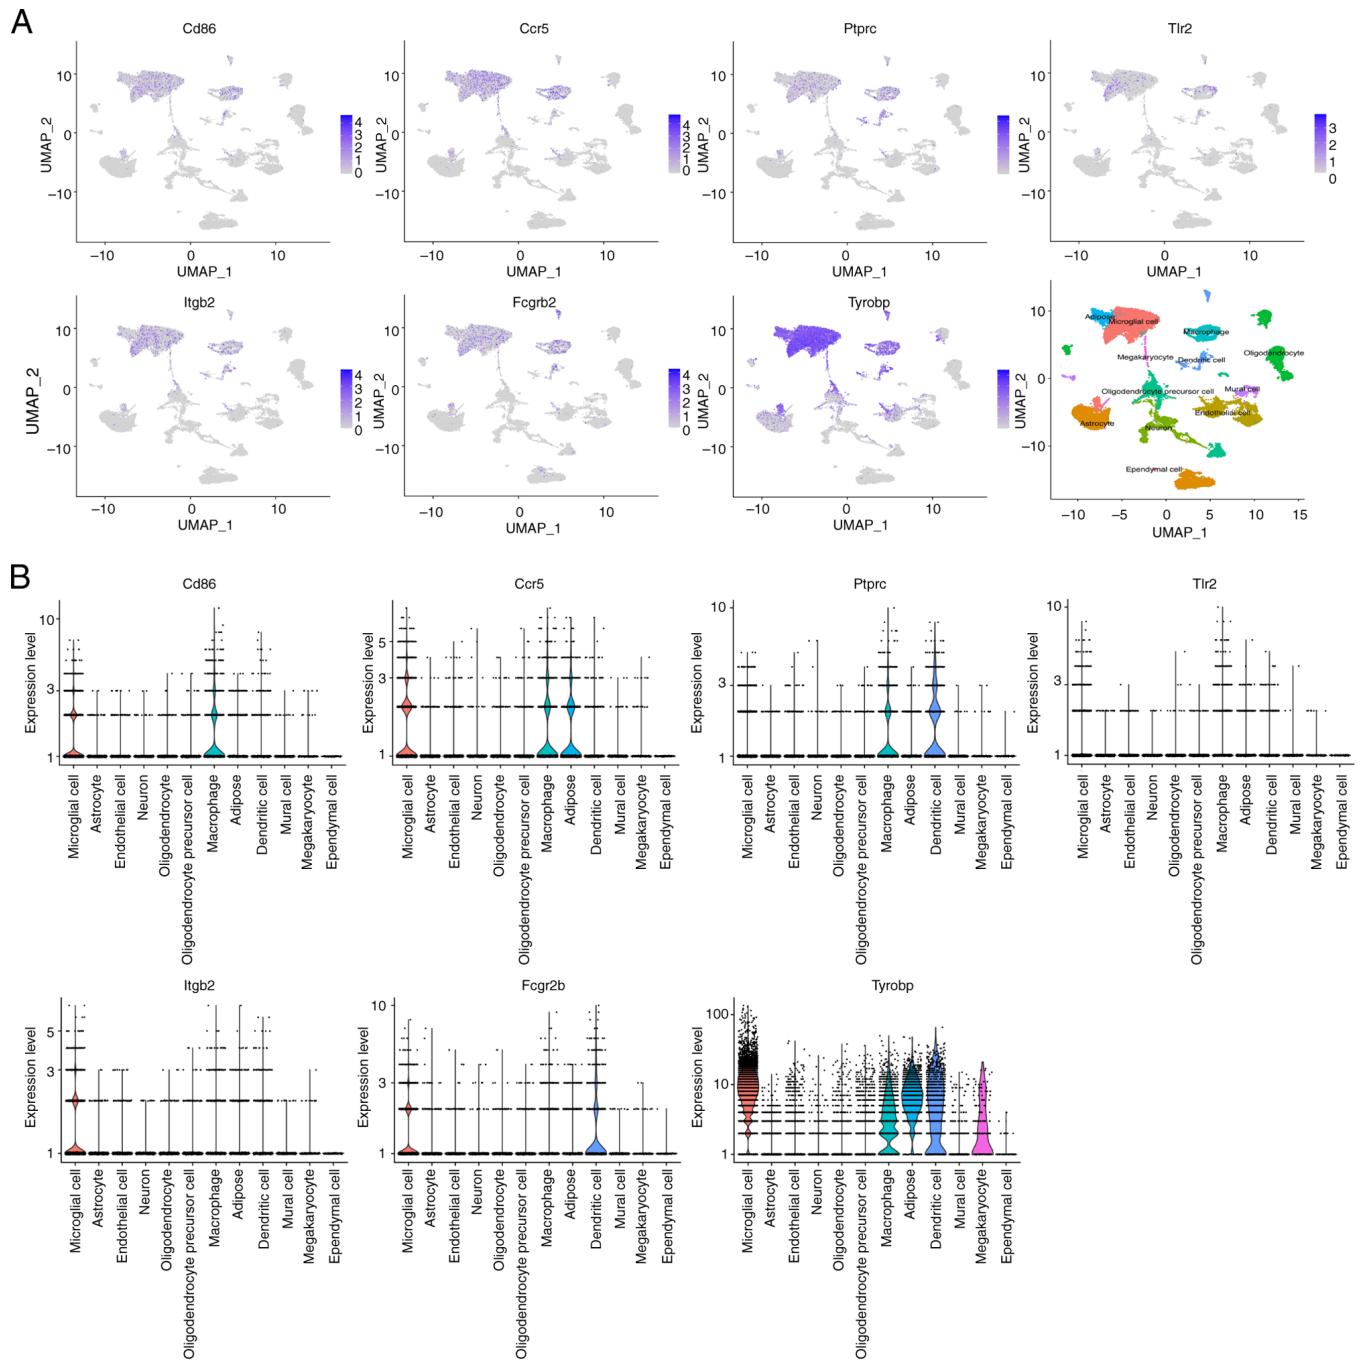

Figure S2. t-SNE plot of cell types based on transcription factor expression after TBI. tSNE, t-distributed stochastic neighbor embedding; TBI, traumatic brain injury.

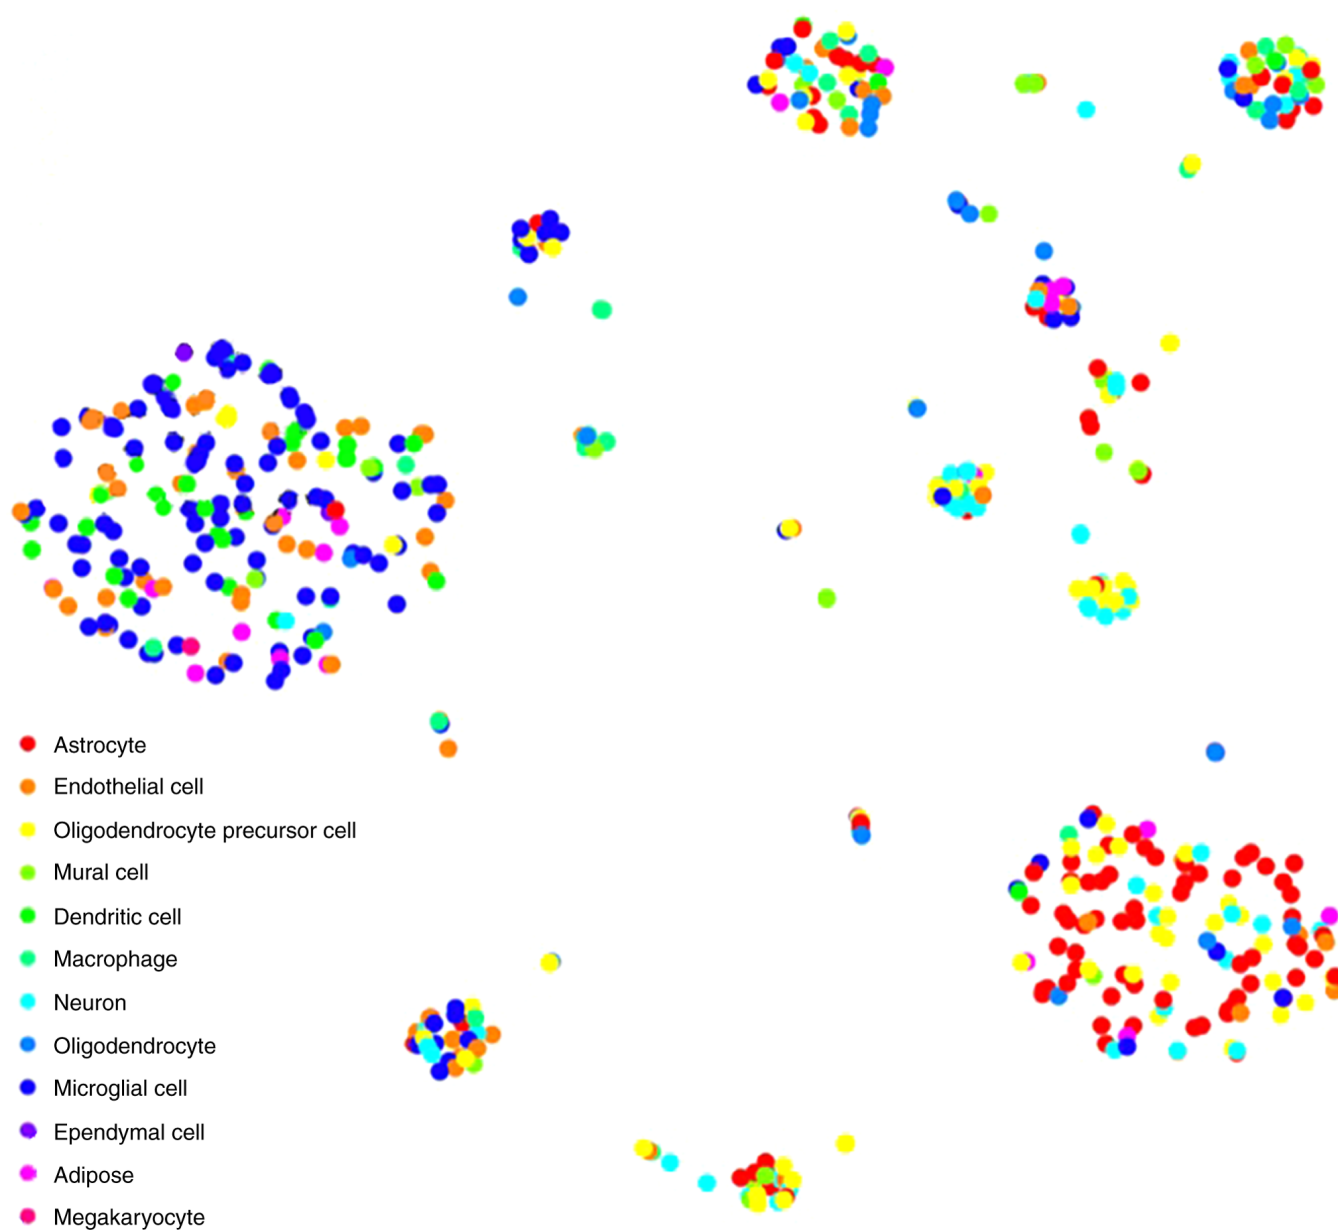

Figure S3. Heat map illustrating transcription factor scores in each cell type.

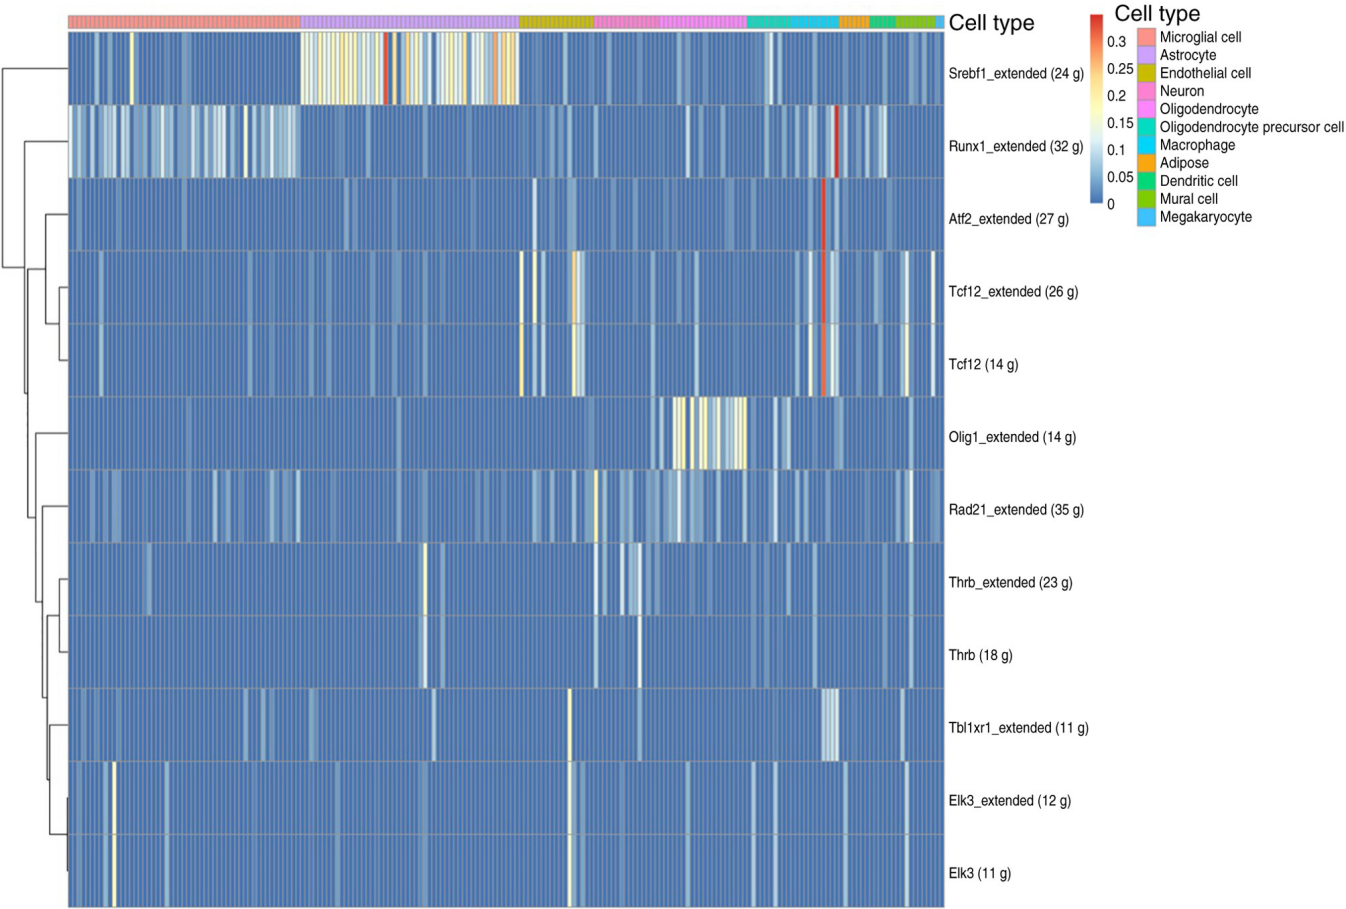

Supplement: Supplementary file 1 [file downloadSupplementary]
